# Supplementary material for: Prognostic Value of Erythroblastic Leukemia Viral Oncogene Homolog 2 and Neuregulin 4 in Hepatocellular Carcinoma
Source: MDPI journal article supplement (doi:10.3390/cancers15092634), 2023-05-06
Supplement: s1 [file s1]

# Supplementary Materials

**Table S1.** ROC curves for ERBB family-related proteins, combinations of ERBB family-related proteins, and serum AFP for predicting 1-year, 3-year, and 5-year mortality.

| Variables        | Cut-off | Sensitivity (%) | Specificity (%) | AUC (CI 95%)        | <i>p</i> -Value |
|------------------|---------|-----------------|-----------------|---------------------|-----------------|
| 1-year mortality |         |                 |                 |                     |                 |
| AFP (ng/mL)      | 17.9    | 70.00           | 67.44           | 0.656 (0.513–0.781) | 0.2078          |
| MIG6 (ng/mL)     | 0.9135  | 90.91           | 65.31           | 0.767 (0.640–0.867) | 0.0026          |
| NRG4 (ng/mL)     | 0.2107  | 90.91           | 69.39           | 0.857 (0.743–0.934) | < 0.0001        |
| ERBB2 (ng/mL)    | 1.6117  | 100.00          | 57.14           | 0.844 (0.727–0.925) | < 0.0001        |
| ERBB2×NRG4       | 0.3388  | 100.00          | 69.39           | 0.918 (0.818–0.973) | < 0.0001        |
| ERBB2×MIG6       | 3.8697  | 90.91           | 87.76           | 0.856 (0.742–0.933) | < 0.0001        |
| NRG4×MIG6        | 0.2863  | 90.91           | 79.59           | 0.819 (0.698–0.907) | 0.0002          |
| ERBB2×NRG4×MIG6  | 0.8430  | 90.91           | 89.80           | 0.856 (0.742–0.933) | < 0.0001        |
| 3-year mortality |         |                 |                 |                     |                 |
| AFP (ng/mL)      | 17.9    | 68.75           | 72.97           | 0.667 (0.524–0.791) | 0.0628          |
| MIG6 (ng/mL)     | 0.9135  | 82.35           | 69.77           | 0.779 (0.653–0.876) | 0.0001          |
| NRG4 (ng/mL)     | 0.1968  | 76.47           | 67.44           | 0.778 (0.653–0.875) | < 0.0001        |
| ERBB2 (ng/mL)    | 1.4201  | 94.12           | 46.51           | 0.740 (0.611–0.845) | 0.0006          |
| ERBB2×NRG4       | 0.3388  | 82.4            | 72.1            | 0.828 (0.708–0.913) | < 0.0001        |
| ERBB2×MIG6       | 2.3728  | 76.47           | 81.40           | 0.817 (0.696–0.905) | < 0.0001        |
| NRG4×MIG6        | 0.1299  | 94.12           | 67.44           | 0.832 (0.714–0.916) | < 0.0001        |
| ERBB2×NRG4×MIG6  | 4.4991  | 94.12           | 65.12           | 0.827 (0.707–0.912) | < 0.0001        |
| 5-year mortality |         |                 |                 |                     |                 |
| AFP (ng/mL)      | 17.9    | 57.89           | 70.59           | 0.607 (0.463–0.738) | 0.2249          |
| MIG6 (ng/mL)     | 0.6573  | 85.00           | 60.00           | 0.733 (0.603–0.839) | 0.0014          |
| NRG4 (ng/mL)     | 0.2361  | 65.00           | 82.50           | 0.789 (0.664–0.883) | < 0.0001        |
| ERBB2 (ng/mL)    | 1.6117  | 80.00           | 60.00           | 0.736 (0.607–0.842) | 0.0004          |
| ERBB2×NRG4       | 0.4309  | 70.00           | 87.50           | 0.831 (0.712–0.916) | < 0.0001        |
| ERBB2×MIG6       | 1.9115  | 75.00           | 72.50           | 0.773 (0.647–0.871) | 0.0001          |
| NRG4×MIG6        | 0.2863  | 70.00           | 85.00           | 0.804 (0.682–0.895) | < 0.0001        |
| ERBB2×NRG4×MIG6  | 0.6622  | 70.00           | 92.50           | 0.818 (0.697–0.906) | < 0.0001        |

ROC, receiver operating characteristic; ERBB family-related proteins, include ERBB2, NRG4, and MIG6; AFP, alpha-fetoprotein; ERBB2, erythroblastic leukemia viral oncogene homolog 2; NRG4, neuregulin 4; MIG6, mitogen-inducible gene 6; AUC, area under the curve; CI, confidence interval.

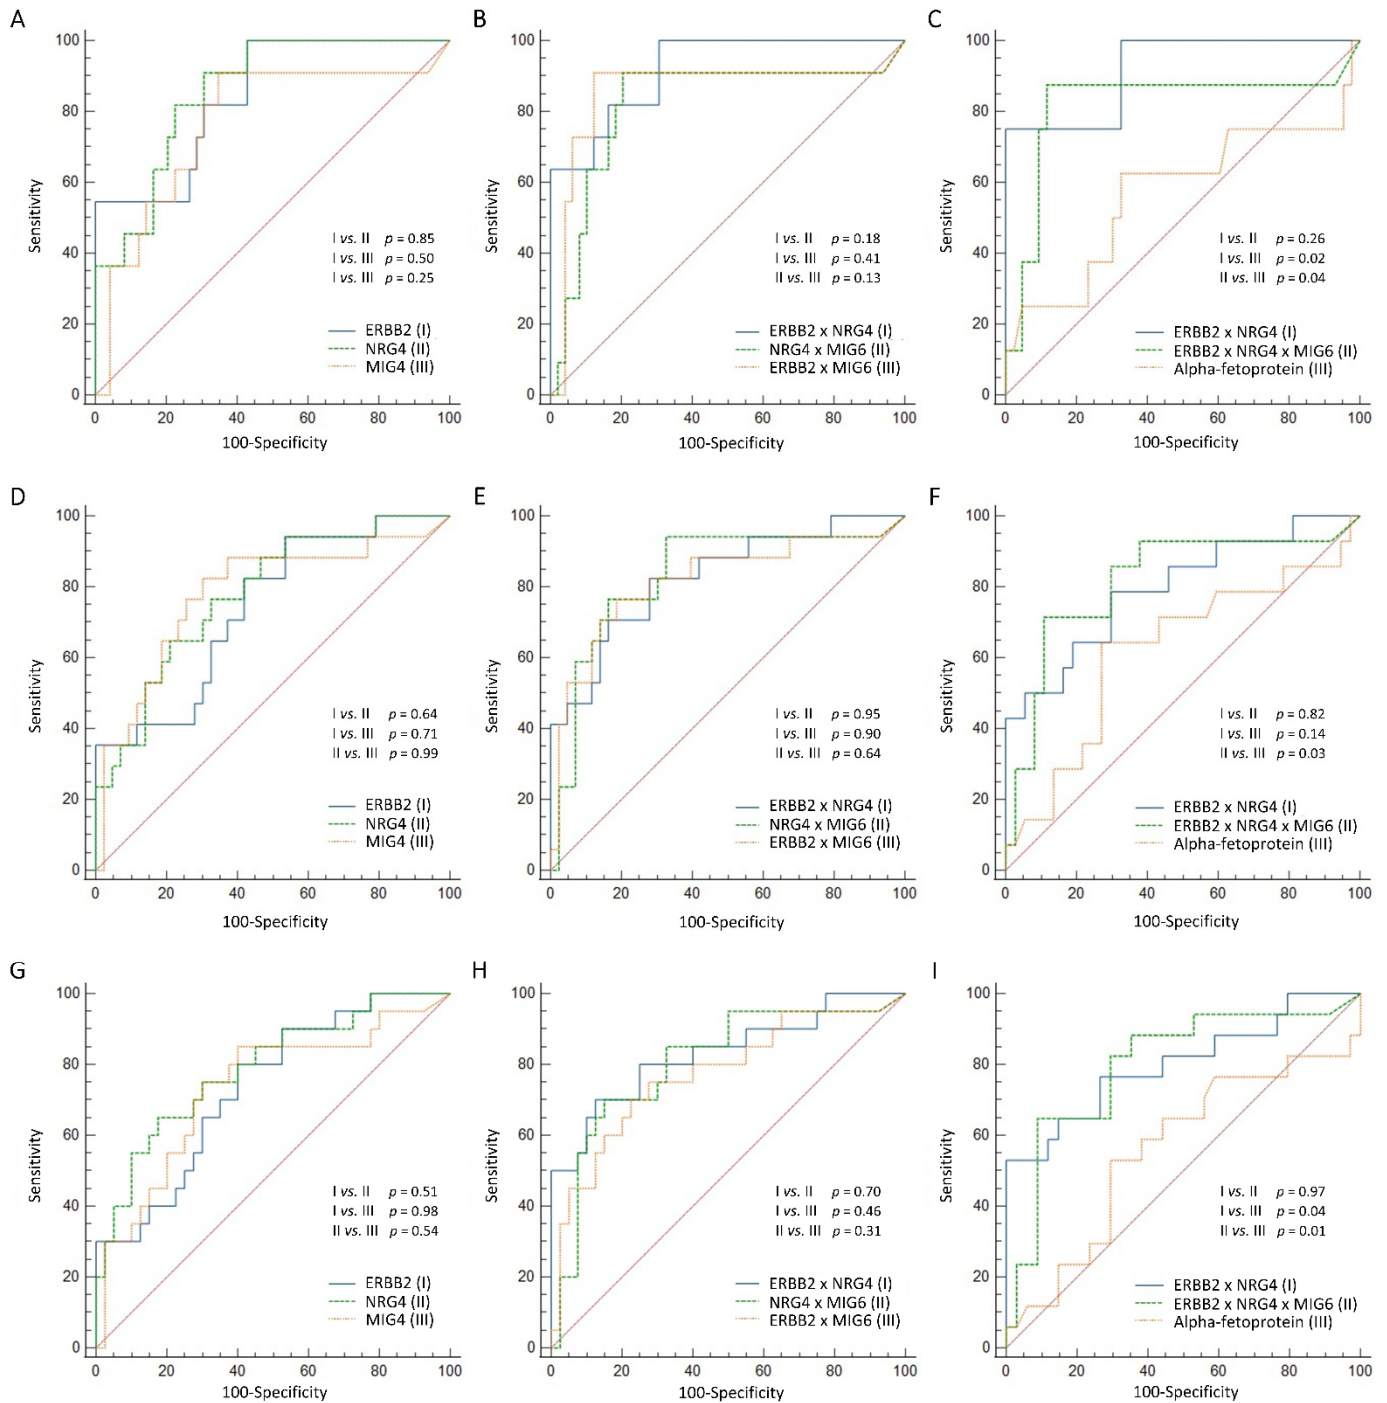

**Figure S1.** Graphs A-C, D-F, and G-I are receiver operating characteristic curves for the prediction of 1-year, 3-year, and 5-year mortality, respectively. (A, D, G) The single factors, such as ERBB2, NRG4, MIG6, were compared to each other and (B, E, H) multiplied values were also compared. The product of ERBB2 and NRG4 with/without MIG6 showed the best result in the area under AUC. (C, F, I) This product shows superior results in AUC, sensitivity, and specificity, compared to the results of alpha-fetoprotein. (ERBB2, erythroblastic leukemia viral oncogene homolog 2; NRG4, neuregulin 4; MIG6, mitogen-inducible gene 6; AUC, area under the curve).
